# Supplementary material
Source: publisher site journal article supplement (https://www.dovepress.com/article/340420)
Supplement: Supplementary file 1 [file get_supplementary_file.php]

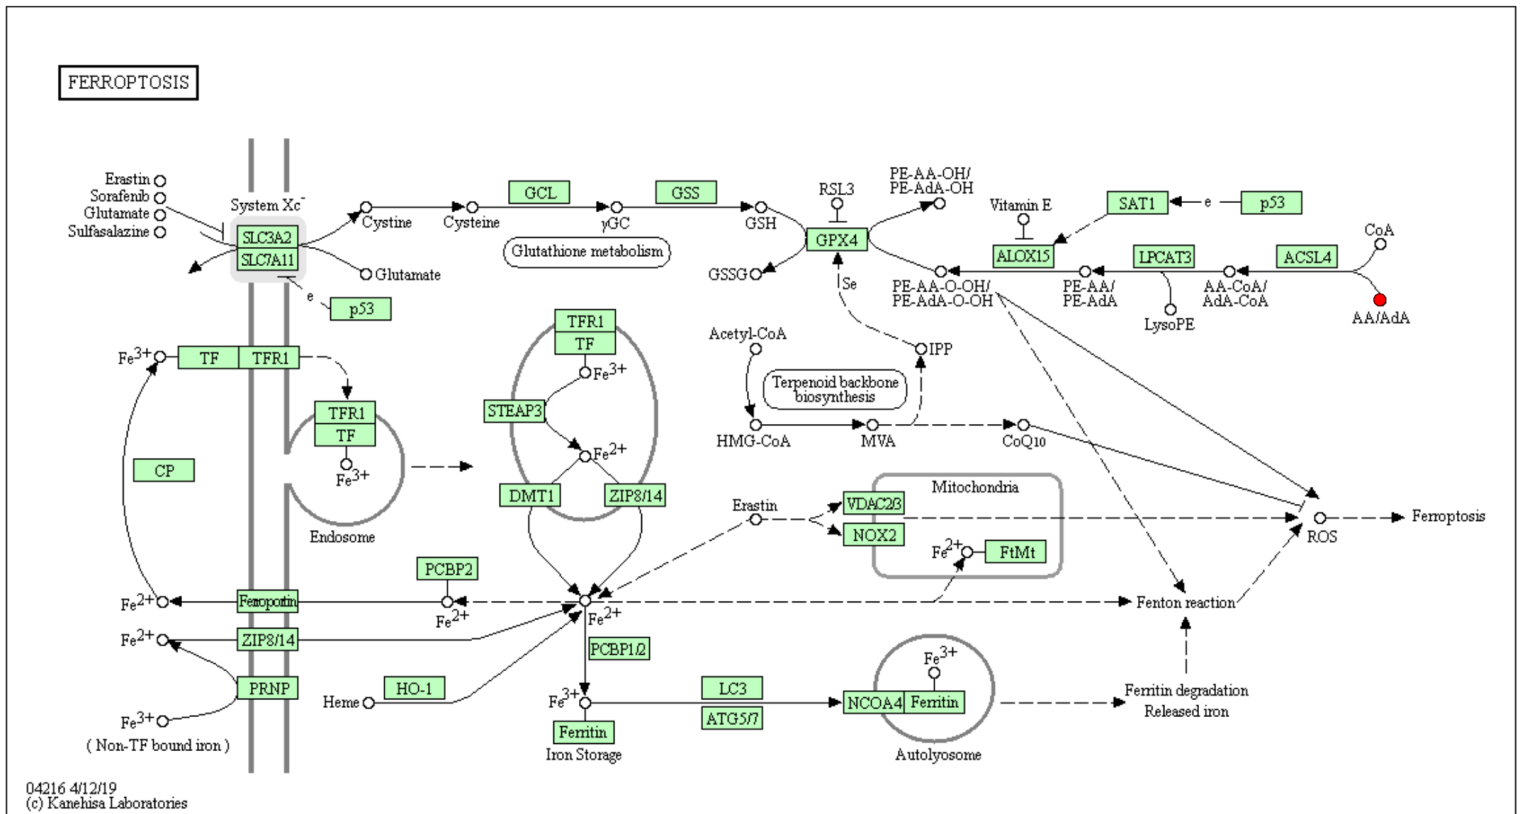

**Supplementary Figure1.** KEGG pathway enrichment analysis of differentially expressed metabolites. KEGG pathway annotation of ferroptosis between LPS and Normal group (KEGG ID: map04216).

Overview of Enriched Metabolite Sets (Top 25)

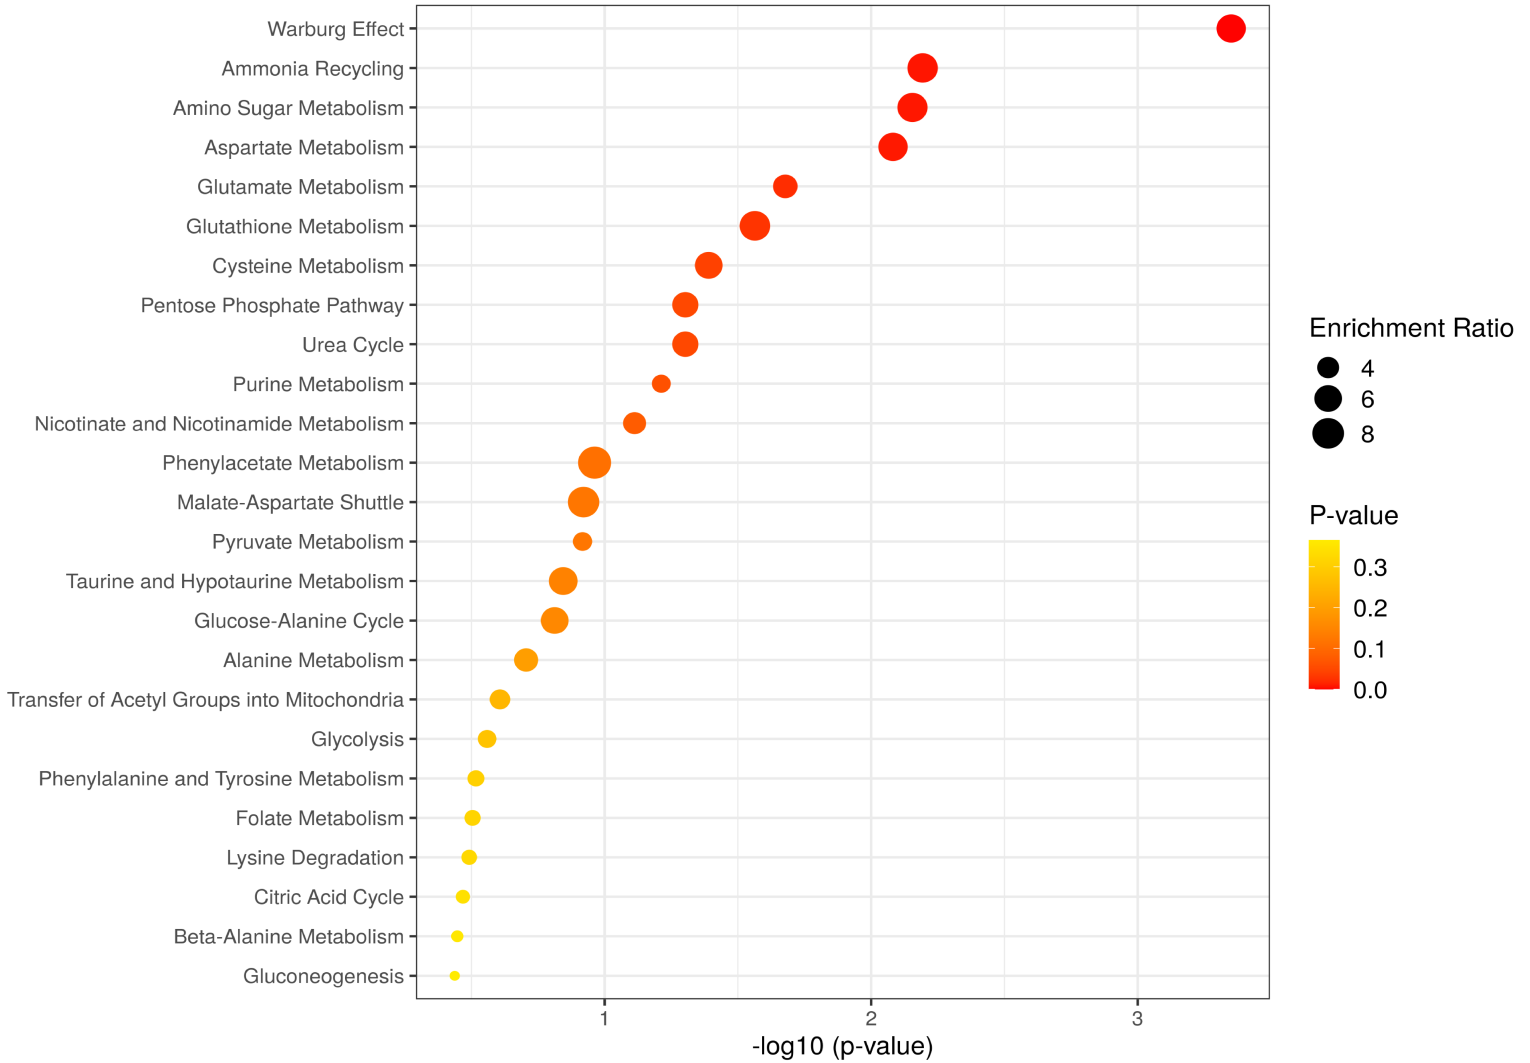

**Supplementary Figure2.** Bubble plot of metabolic pathways (top25) built by metaboanalyst. Pathway annotation of differentially enriched metabolites affected by Dex in sepsis.

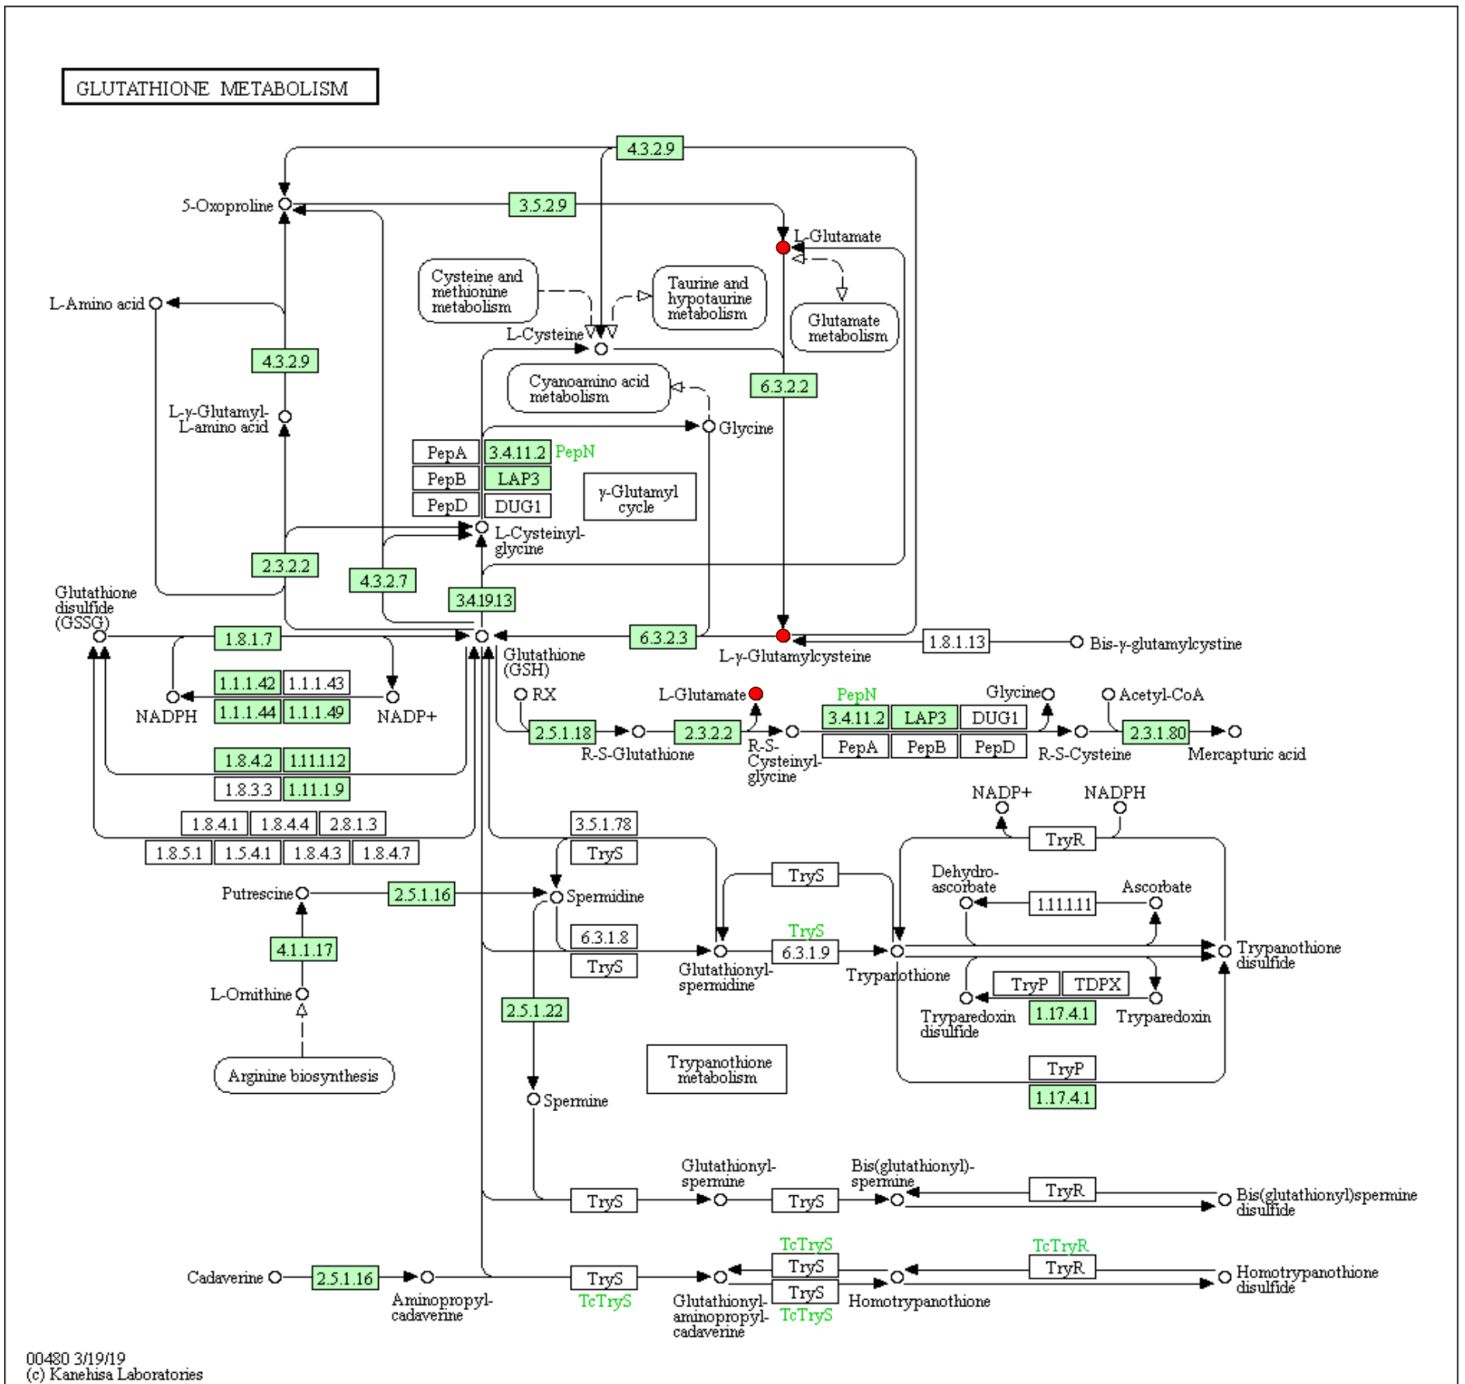

**Supplementary Figure3.** KEGG pathway annotation of Glutathione metabolism affected by Dex in sepsis (KEGG ID: map00480).
